# Supplementary material for: Identification of TSG101 Functional Domains and p21 Loci Required for TSG101-Mediated p21 Gene Regulation
Source: PubMed Central journal article supplement (PMC3823576; doi:10.1371/journal.pone.0079674), 2013-11-11
Supplement: pone.0079674.s004.pdf [file pone.0079674.s004.pdf]

**Table S1.**

| <b>ChIP</b>            | <b>sequence</b>                    |
|------------------------|------------------------------------|
| a- 5' primer           | 5'-G TTCAGGTGAGTGTAGGGTGTAG-3'     |
| a- 3' primer           | 5'-TTTTTTTACTTGGAGAATG AGTTGGC-3'  |
| b- 5' primer           | 5'-GGAGGTCAGGGGTGTGAGGTAGAT-3'     |
| b- 3' primer           | 5'-GGAA GGAGGGAATTGGAGAGACTA-3'    |
| c- 5' primer           | 5'-TGGTTTGGATGTATAGGAGCGAA GGTG-3' |
| c- 3' primer           | 5'-CTCCAAAATGACAAAATGCCAAATAAC-3'  |
| d- 5' primer           | 5'-CAG CCTGCTCCCTTGCCTTTTTCA-3'    |
| d- 3' primer           | 5'-GACCCCACTCTAAGCCCACTG C-3'      |
| e- 5' primer           | 5'-GGGGGCTGGACTGGGCACTCTTGT-3'     |
| e- 3' primer           | 5'-GCTCACCAC CACCACGACATTCAA-3'    |
| f- 5' primer           | 5'-CTGAGATTGTGCCACTGCTGACTTT-3'    |
| f- 3' primer           | 5'-CCAGAAAGCCAATCAGAGCCACAGCC-3'   |
| <b>qPCR</b>            | <b>sequence</b>                    |
| p21 qPCR-5' primer     | 5'-TCACTGTCTTGTACCCTTGTGC-3'       |
| p21 qPCR-3' primer     | 5'-GGCGTTTGGAGTGGTAGAAA-3'         |
| b-actin qPCR-5' primer | 5'-GCACCCAGCACAATGAAGA-3'          |
| b-actin qPCR-3' primer | 5'-CGATCCACACGGAGTACTTG-3'         |
