# Supplementary material for: Identification of TSG101 Functional Domains and p21 Loci Required for TSG101-Mediated p21 Gene Regulation
Source: PubMed Central journal article supplement (PMC3823576; doi:10.1371/journal.pone.0079674), 2013-11-11
Supplement: pone.0079674.s005.pdf [file pone.0079674.s005.pdf]

**Table S2.**

| GenBank ID          | Gene Symbol | Gene Name                                                                                        | Log2 Ratio | P value  |
|---------------------|-------------|--------------------------------------------------------------------------------------------------|------------|----------|
| <i>Up-regulated</i> |             |                                                                                                  |            |          |
| AA115877            | SERPIN1     | Serpin peptidase inhibitor, clade I (neuroserpin), member 1                                      | 3.594      | 2.06E-04 |
| AA683041            | NPTX2       | Neuronal pentraxin II                                                                            | 3.376      | 1.94E-05 |
| AI732248            | COL4A1      | Collagen, type IV, alpha 1                                                                       | 3.361      | 2.61E-05 |
| AA459895            | CCDC64B     | Coiled-coil domain containing 64B                                                                | 3.170      | 1.39E-04 |
| AA994913            | GALNT12     | UDP-N-acetyl-alpha-D-galactosamine:polypeptide N-acetylgalactosaminyltransferase 12 (GalNAc-T12) | 3.105      | 4.28E-06 |
| AA903339            | RET         | Ret proto-oncogene                                                                               | 3.036      | 2.75E-05 |
| AA492170            | NKX3-1      | NK3 homeobox 1                                                                                   | 2.957      | 1.00E-05 |
| N50428              | SLAIN1      | SLAIN motif family, member 1                                                                     | 2.946      | 9.83E-06 |
| AA457718            | CLIC5       | Chloride intracellular channel 5                                                                 | 2.887      | 1.02E-05 |
| AA608524            | MIB2        | Mindbomb homolog 2 (Drosophila)                                                                  | 2.812      | 3.00E-05 |
| AI732255            | SFTPD       | Surfactant protein D                                                                             | 2.796      | 1.48E-05 |
| AI821374            | SFTPA1      | Surfactant protein A1                                                                            | 2.771      | 1.89E-05 |
| AI276270            | EMB         | Embigin                                                                                          | 2.742      | 1.14E-05 |
| N22495              | EMCN        | Endomucin                                                                                        | 2.730      | 1.10E-05 |
| AW058501            | COL4A4      | Collagen, type IV, alpha 4                                                                       | 2.723      | 6.28E-04 |
| R43270              | PPP1R14C    | protein phosphatase 1, regulatory (inhibitor) subunit 14C                                        | 2.679      | 1.16E-04 |

|          |         |                                                                                   |       |          |
|----------|---------|-----------------------------------------------------------------------------------|-------|----------|
| AI444994 | JAK1    | Janus kinase 1                                                                    | 2.643 | 3.36E-03 |
| R51361   | NFIB    | Nuclear factor I/B                                                                | 2.640 | 1.18E-05 |
| AA169183 | ST8SIA1 | ST8 alpha-N-acetyl-neuraminide alpha-2,8-sialyltransferase 1                      | 2.627 | 5.02E-04 |
| AA425820 | CCDC74A | Coiled-coil domain containing 74A                                                 | 2.602 | 1.51E-05 |
| AA228477 | TARP    | TCR gamma alternate reading frame protein                                         | 2.509 | 2.17E-05 |
| AA977683 | SGIP1   | SH3-domain GRB2-like (endophilin) interacting protein 1                           | 2.495 | 2.28E-05 |
| T92782   | SYK     | Spleen tyrosine kinase                                                            | 2.490 | 2.03E-05 |
| H23524   | SYT4    | Synaptotagmin IV                                                                  | 2.479 | 4.37E-05 |
| AI983123 | BRDT    | Bromodomain, testis-specific                                                      | 2.467 | 4.02E-05 |
| AI225111 | GJB3    | Gap junction protein, beta 3, 31kDa                                               | 2.453 | 2.13E-05 |
| AA418392 | KCNMB4  | Potassium large conductance calcium-activated channel, subfamily M, beta member 4 | 2.452 | 7.58E-05 |
| AA872098 | NCF2    | Neutrophil cytosolic factor 2                                                     | 2.428 | 2.84E-05 |
| AA603356 | PLEKHH1 | Pleckstrin homology domain containing, family H (with MyTH4 domain) member 1      | 2.427 | 3.28E-05 |
| AA863023 | SCGB1C1 | Secretoglobin, family 1C, member 1                                                | 2.416 | 3.85E-05 |
| AA464180 | BEX2    | Brain expressed X-linked 2                                                        | 2.413 | 2.01E-05 |
| AI732254 | GKN2    | Gastrokine 2                                                                      | 2.413 | 2.54E-03 |
| AI732256 | AGR3    | Anterior gradient homolog 3 ( <i>Xenopus laevis</i> )                             | 2.407 | 3.59E-05 |
| R54212   | XKR4    | XK, Kell blood group complex subunit-related family, member 4                     | 2.396 | 8.57E-05 |
| AA420679 | XCL2    | Chemokine (C motif) ligand 2                                                      | 2.358 | 3.20E-05 |
| AA169475 | SNAPC5  | Small nuclear RNA activating complex, polypeptide 5, 19kDa                        | 2.353 | 5.94E-05 |
| AI740542 | FXYP1   | FXYP domain containing ion transport regulator 1                                  | 2.351 | 5.59E-03 |
| N23941   | CDKN1A  | Cyclin-dependent kinase inhibitor 1A (p21, Cip1)                                  | 2.343 | 3.35E-04 |
| AI193221 | ZNF720  | Zinc finger protein 720                                                           | 2.342 | 4.04E-05 |

|          |           |                                                                   |       |          |
|----------|-----------|-------------------------------------------------------------------|-------|----------|
| AA443593 | ACRBP     | Acrosin binding protein                                           | 2.336 | 5.84E-05 |
| AI732298 | DNAJA4    | DnaJ (Hsp40) homolog, subfamily A, member 4                       | 2.333 | 3.55E-05 |
| AI732290 | MYOT      | Myotilin                                                          | 2.322 | 6.92E-04 |
| AA479055 | PUS1      | Pseudouridylate synthase 1                                        | 2.322 | 6.92E-04 |
| W23758   | USP54     | Ubiquitin specific peptidase 54                                   | 2.316 | 7.11E-05 |
| AA490240 | KRTAP19-1 | Keratin associated protein 19-1                                   | 2.299 | 5.96E-05 |
| N45301   | CALCRL    | Calcitonin receptor-like                                          | 2.299 | 3.47E-05 |
| H99722   | ANO5      | Anoctamin 5                                                       | 2.293 | 4.59E-05 |
| AA629873 | UBA6      | Ubiquitin-like modifier activating enzyme 6                       | 2.289 | 8.66E-05 |
| N69335   | COL9A1    | Collagen, type IX, alpha 1                                        | 2.286 | 2.81E-05 |
| R70505   | P2RY2     | Purinergic receptor P2Y, G-protein coupled, 2                     | 2.267 | 3.63E-05 |
| AI732322 | CKAP2     | Cytoskeleton associated protein 2                                 | 2.230 | 4.95E-05 |
| AA977633 | NRK       | Nik related kinase                                                | 2.225 | 7.99E-05 |
| W60582   | BEX1      | Brain expressed, X-linked 1                                       | 2.222 | 2.78E-03 |
| AA460698 | PAMR1     | Peptidase domain containing associated with muscle regeneration 1 | 2.213 | 5.64E-05 |
| AA412443 | LCN10     | Lipocalin 10                                                      | 2.212 | 5.15E-05 |
| AA425730 | ILDR1     | Immunoglobulin-like domain containing receptor 1                  | 2.193 | 3.75E-05 |
| AA988559 | SCGB3A2   | Secretoglobin, family 3A, member 2                                | 2.192 | 9.59E-05 |
| AA410381 | SNCAIP    | Synuclein, alpha interacting protein                              | 2.189 | 3.65E-04 |
| H15099   | ANK2      | Ankyrin 2, neuronal                                               | 2.178 | 3.81E-05 |
| AI821350 | SFTPA2B   | surfactant protein A2B                                            | 2.177 | 6.84E-05 |
| AA534438 | SPINK4    | Serine peptidase inhibitor, Kazal type 4                          | 2.173 | 9.24E-05 |
| AA745686 | BHMT2     | Betaine--homocysteine S-methyltransferase 2                       | 2.171 | 3.42E-04 |

|          |         |                                                                                   |       |          |
|----------|---------|-----------------------------------------------------------------------------------|-------|----------|
| AA172188 | PCDHA6  | Protocadherin alpha 6                                                             | 2.171 | 3.89E-05 |
| AA029949 | NPNT    | Nephronectin                                                                      | 2.170 | 4.81E-05 |
| N21659   | MORN4   | MORN repeat containing 4                                                          | 2.166 | 1.21E-04 |
| AA429034 | PIK3IP1 | Phosphoinositide-3-kinase interacting protein 1                                   | 2.157 | 2.01E-04 |
| AA100297 | LGALS4  | Lectin, galactoside-binding, soluble, 4                                           | 2.148 | 1.20E-04 |
| AA746038 | GPR110  | G protein-coupled receptor 110                                                    | 2.145 | 1.19E-04 |
| AA996091 | FSIP1   | Fibrous sheath interacting protein 1                                              | 2.136 | 9.36E-05 |
| AA228476 | SLC26A7 | Solute carrier family 26, member 7                                                | 2.130 | 1.95E-04 |
| AA131664 | PRELP   | Proline/arginine-rich end leucine-rich repeat protein                             | 2.130 | 1.44E-03 |
| AA101678 | MYCN    | V-myc myelocytomatosis viral related oncogene, neuroblastoma derived (avian)locus | 2.127 | 4.78E-05 |
| AA488171 | DAB2IP  | DAB2 interacting protein                                                          | 2.126 | 6.51E-03 |
| AA233805 | DAB1    | Disabled homolog 1 (Drosophila)                                                   | 2.121 | 9.89E-04 |
| AA632429 | LRRFIP1 | Leucine rich repeat (in FLII) interacting protein 1                               | 2.119 | 7.48E-05 |
| AA996097 | PANX2   | Pannexin 2                                                                        | 2.116 | 2.10E-04 |
| AA167273 | SDC3    | Syndecan 3                                                                        | 2.100 | 6.08E-05 |
| AA525000 | WDFY3   | WD repeat and FYVE domain containing 3                                            | 2.099 | 6.38E-05 |
| AA564296 | PIP     | Prolactin-induced protein                                                         | 2.085 | 2.06E-04 |
| AA149051 | PGR     | Progesterone receptor                                                             | 2.080 | 5.36E-05 |
| R42056   | LGI2    | Leucine-rich repeat LGI family, member 2                                          | 2.073 | 2.59E-04 |
| AA514424 | FAM3D   | Family with sequence similarity 3, member D                                       | 2.065 | 9.00E-05 |
| H85454   | KCNS1   | Potassium voltage-gated channel, delayed-rectifier, subfamily S, member 1         | 2.064 | 9.77E-05 |
| AA457474 | RAMP2   | Receptor (G protein-coupled) activity modifying protein 2                         | 2.059 | 1.47E-04 |
| R02333   | UBXN10  | UBX domain protein 10                                                             | 2.058 | 4.10E-04 |

|          |         |                                                          |       |          |
|----------|---------|----------------------------------------------------------|-------|----------|
| AA451911 | GPR126  | G protein-coupled receptor 126                           | 2.054 | 1.18E-04 |
| AI769855 | DEFB1   | Defensin, beta 1                                         | 2.048 | 1.91E-04 |
| AA180237 | TCF7L1  | Transcription factor 7-like 1 (T-cell specific, HMG-box) | 2.038 | 7.53E-05 |
| AA973944 | PGBD5   | PiggyBac transposable element derived 5                  | 2.037 | 7.26E-04 |
| AI732898 | CLEC5A  | C-type lectin domain family 5, member A                  | 2.036 | 7.78E-05 |
| AA907365 | TMEM146 | Transmembrane protein 146                                | 2.034 | 1.29E-04 |
| AA875890 | GRIN2A  | Glutamate receptor, ionotropic, N-methyl D-aspartate 2A  | 2.026 | 7.24E-05 |
| AI273601 | KPRP    | Keratinocyte proline-rich protein                        | 2.025 | 6.06E-05 |
| AA621001 | LRRTM3  | Leucine rich repeat transmembrane neuronal 3             | 2.020 | 7.88E-05 |
| AI732312 | EPHB1   | EPH receptor B1                                          | 2.019 | 1.53E-04 |
| R54590   | PLEKHA6 | Pleckstrin homology domain containing, family A member 6 | 2.016 | 3.43E-04 |
| AA469952 | ALLC    | Allantoicase                                             | 2.014 | 4.56E-04 |
| AI016902 | AICDA   | Activation-induced cytidine deaminase                    | 2.011 | 1.14E-04 |
| AA928139 | PCDH17  | Protocadherin 17                                         | 2.008 | 1.32E-04 |
| R99004   | DHRS7   | Dehydrogenase/reductase (SDR family) member 7            | 2.000 | 4.99E-04 |
| AA458634 | NQO1    | NAD(P)H dehydrogenase, quinone 1                         | 2     | 1.45E-03 |

*Down-regulated*

|          |          |                                                                                     |        |          |
|----------|----------|-------------------------------------------------------------------------------------|--------|----------|
| T72089   | NNMT     | Nicotinamide N-methyltransferase                                                    | -4.602 | 8.92E-06 |
| AA449321 | LRRC15   | Leucine rich repeat containing 15                                                   | -4.387 | 5.98E-07 |
| AA457688 | IMPA1    | Inositol(myo)-1(or 4)-monophosphatase 1                                             | -4.303 | 2.74E-05 |
| R42630   | PCSK1    | Proprotein convertase subtilisin/kexin type 1                                       | -3.459 | 8.79E-05 |
| AA055835 | CAV1     | Caveolin 1, caveolae protein, 22kDa                                                 | -3.251 | 5.88E-06 |
| T95052   | CASP1    | Caspase 1, apoptosis-related cysteine peptidase (interleukin 1, beta, convertase)   | -3.168 | 1.93E-04 |
| H59861   | THBD     | Thrombomodulin                                                                      | -3.080 | 5.03E-05 |
| N62462   | CFI      | Complement factor I                                                                 | -3.027 | 6.99E-06 |
| AA449715 | SRPX     | Sushi-repeat containing protein, X-linked                                           | -3.018 | 7.44E-06 |
| AA176812 | POLR1E   | Polymerase (RNA) I polypeptide E, 53kDa                                             | -3.000 | 1.86E-04 |
| H82419   | PTPRA    | Protein tyrosine phosphatase, receptor type, A                                      | -2.907 | 2.19E-04 |
| AA425746 | RUNX1    | Runt-related transcription factor 1                                                 | -2.867 | 7.92E-05 |
| AI346653 | THY1     | Thy-1 cell surface antigen                                                          | -2.819 | 1.54E-04 |
| H08561   | IGFBP5   | Insulin-like growth factor binding protein 5                                        | -2.812 | 1.28E-05 |
| AI148233 | IL11     | Interleukin 11                                                                      | -2.777 | 1.07E-05 |
| AA447684 | SPRR1B   | Small proline-rich protein 1B                                                       | -2.755 | 2.87E-04 |
| AA633901 | TGFBI    | Transforming growth factor, beta-induced, 68kDa                                     | -2.739 | 1.31E-05 |
| AA905329 | SENP1    | SUMO1/sentrin specific peptidase 1                                                  | -2.721 | 1.49E-05 |
| R12373   | PON1     | Paraoxonase 1                                                                       | -2.705 | 1.43E-05 |
| H90764   | SERPINA6 | Serpin peptidase inhibitor, clade A (alpha-1 antiproteinase, antitrypsin), member 6 | -2.667 | 2.90E-04 |
| AA098867 | NRP1     | Neuropilin 1                                                                        | -2.661 | 1.10E-05 |
| AA173525 | ZNF654   | zinc finger protein 654                                                             | -2.630 | 1.20E-05 |

|          |        |                                                                    |        |          |
|----------|--------|--------------------------------------------------------------------|--------|----------|
| H91456   | NR1H4  | Nuclear receptor subfamily 1, group H, member 4                    | -2.600 | 3.37E-04 |
| H20814   | ARL3   | ADP-ribosylation factor-like 3                                     | -2.585 | 4.02E-04 |
| AA464176 | PIK3CG | Phosphoinositide-3-kinase, catalytic, gamma polypeptide            | -2.544 | 1.47E-05 |
| AI191504 | AK7    | Adenylate kinase 7                                                 | -2.500 | 9.42E-05 |
| R56092   | MYT1L  | Myelin transcription factor 1-like                                 | -2.500 | 6.07E-03 |
| R73909   | PSG11  | Pregnancy specific beta-1-glycoprotein 6                           | -2.472 | 3.90E-03 |
| AA088420 | PPARG  | Peroxisome proliferator-activated receptor gamma                   | -2.468 | 1.99E-05 |
| N71920   | ODZ2   | odz, odd Oz/ten-m homolog 2 (Drosophila)                           | -2.461 | 6.05E-05 |
| AA131406 | CXCL9  | Chemokine (C-X-C motif) ligand 9                                   | -2.459 | 5.18E-04 |
| N34362   | RGS5   | Regulator of G-protein signaling 5                                 | -2.453 | 3.24E-04 |
| AA485373 | VMP1   | Vacuole membrane protein 1                                         | -2.405 | 8.13E-05 |
| N22620   | AMIGO2 | Adhesion molecule with Ig-like domain 2                            | -2.360 | 4.93E-05 |
| R56082   | SV2B   | Synaptic vesicle glycoprotein 2B                                   | -2.324 | 3.17E-05 |
| H65734   | KLF1   | Kruppel-like factor 1 (erythroid)                                  | -2.322 | 6.92E-04 |
| AA669451 | MKRN1  | Makorin ring finger protein 1                                      | -2.322 | 6.92E-04 |
| AA416767 | CCDC80 | Coiled-coil domain containing 80                                   | -2.291 | 4.90E-05 |
| W48852   | GREM1  | Gremlin 1                                                          | -2.258 | 3.71E-03 |
| AA454652 | F2RL1  | Coagulation factor II (thrombin) receptor-like 1                   | -2.252 | 1.82E-04 |
| AA972352 | PDLIM3 | PDZ and LIM domain 3                                               | -2.238 | 4.24E-05 |
| AA029997 | COL4A5 | Collagen, type IV, alpha 5                                         | -2.230 | 4.64E-03 |
| N67039   | CDK6   | Cyclin-dependent kinase 6                                          | -2.217 | 3.54E-05 |
| AA995128 | FIGF   | C-fos induced growth factor (vascular endothelial growth factor D) | -2.216 | 1.59E-04 |
| R39044   | RAB27B | RAB27B, member RAS oncogene family                                 | -2.214 | 3.60E-05 |

|          |          |                                                           |        |          |
|----------|----------|-----------------------------------------------------------|--------|----------|
| AA779870 | FHAD1    | Forkhead-associated (FHA) phosphopeptide binding domain 1 | -2.152 | 1.82E-03 |
| R41754   | TMEM132B | Transmembrane protein 132B                                | -2.122 | 1.91E-04 |
| R69567   | PSG5     | pregnancy specific beta-1-glycoprotein 5                  | -2.113 | 8.34E-04 |
| AI828190 | PLAUR    | Plasminogen activator, urokinase receptor                 | -2.094 | 7.80E-04 |
| T87622   | SAP30    | Sin3A-associated protein, 30kDa                           | -2.085 | 6.60E-03 |
| H84369   | POPDC3   | Popeye domain containing 3                                | -2.069 | 1.66E-03 |
| AA703531 | IL24     | Interleukin 24                                            | -2.058 | 6.89E-05 |
| AA056415 | FBN1     | Fibrillin 1                                               | -2.051 | 1.72E-04 |
| AA010664 | TAGLN    | Transgelin                                                | -2.048 | 5.66E-05 |
| AA455235 | ALDH1A3  | Aldehyde dehydrogenase 1 family, member A3                | -2.032 | 4.82E-03 |
| N79051   | ROS1     | C-ros oncogene 1 , receptor tyrosine kinase               | -2.020 | 1.57E-04 |
| H22854   | REPS2    | RALBP1 associated Eps domain containing 2                 | -2.015 | 1.42E-03 |
| AA702808 | ADAM12   | ADAM metallopeptidase domain 12                           | -2.014 | 2.80E-04 |
| H23197   | MOBP     | Myelin-associated oligodendrocyte basic protein           | -2.012 | 6.06E-03 |
| AA777187 | CYR61    | Cysteine-rich, angiogenic inducer, 61                     | -2.011 | 6.74E-04 |
| H17080   | MBP      | Myelin basic protein                                      | -2     | 1.45E-03 |
| H37761   | NR4A3    | Nuclear receptor subfamily 4, group A, member 3           | -2     | 1.45E-03 |

---
